# Supplementary material
Source: publisher figshare collection journal article supplement (https://sage.figshare.com/ndownloader/files/17360114)
Supplement: Supplementary file 1 [file 17360114]

| **Supplementary Table 1**  ***The New York Times* articles with story-level pegs (Sept-Oct, 2014)** | |  |
| --- | --- | --- |
|  |  |  |
| **Date** | **Topic description** | **Type** |
| 9-Sep | The British Royal couple - Prince William and Kate - and their newborn second baby | 1 & 3 |
| 18-Sep | New Palestinian uprising leads to violent clashes in Jerusalem | 1 & 2 |
| 29-Sep | Thai government is concerned about Thai food quality around the world and introduces measures to improve it | 3 |
| 29-Sep | Radical Buddhist monk calls for action and unity against Muslims and other religions | 1 |
| 8-Oct | Efforts to carry out restoration work for the home of Catherine the Great in a German town | 1 |
| 12-Oct | The Nile River Dam project in Ethiopia stirs hope at home while creating tensions with neighbors | 1 |
| 12-Oct | Chinese President taps into Chinese classics for political wisdom and governance ideas | 1 |
| 17-Oct | Trekking in the Himalayas led to deaths for international mountain climbers * | 1 |
| 17-Oct | Growing numbers of Israeli youths moving to Berlin, Germany, stokes controversy/tension between the young and the old generations in Israel | 2 |
| 17-Oct | Japan's conservatives challenge accounts of war history | 2 |
| 25-Oct | A group of Israeli women held the Bat Mitzvah ceremony at Western Wall, against the established tradition and the wishes of the male orthodoxy who control the holy site. | 1 |
|  |  |  |
|  |  |  |
| ***The New York Times* articles with story-level pegs (Sept-Oct, 2000)** | |  |
|  |  |  |
| **Date** | **Topic description** | **Type** |
| 1-Sep | An exhibition that displays Poland's past: Polish struggle with its brand of communism and domination by the Soviet Union. | 2 |
| 11-Sep | New archeological dig in Egypt uncovers large numbers of mummies | 1 |
| 11-Sep | Musicians in Nigeria tell stories in Afro-beat and defy dictators | 2 |
| 22-Oct | Dictator and his junta in Ivory Coast run the election to the detriment of popular democracy | 2 |
| 22-Oct | Belgian cardinal says in a book that Pope John Paul II may soon retire, fueling a controversy | 1 |
|  |  |  |
|  |  |  |
| ***The New York Times* articles with story-level pegs (Sept-Oct, 1985)** | |  |
|  |  |  |
| **Date** | **Topic description** | **Type** |
| 1-Sep | An Israeli doctor gains popularity in the Arab world by broadcasting a medical program in which listeners are invited to ask questions | 1 & 2 |
| 1-Sep | Liverpool, birthplace of "Beatles," became a site for tourism, events and shopping for Beatlemania | 2 |
| 11-Sep | Sewage pollutes the beaches in Alexandria, Egypt, driving away many holiday makers | 1 |
| 11-Sep | Bi-racial people in South Africa find themselves in legal, cultural and social limbo because of apartheid | 2 |
| 10-Oct | British author and politician Jeffrey Archer, and his novel about British premier Margaret Thatcher | 2 |
| 10-Oct | A funeral of an anti-fascist in Germany was attended by thousands | 2 |
| 10-Oct | Japanese prime minister to cancel visit to Yasukuni shrine, which is dedicated to the war dead, in an effort to avoid confrontation with the Chinese government | 1 & 2 |
| 22-Oct | Princess Diana pays a surprise visit to Northern Ireland and receives warm welcome from protestants | 1 & 2 |

| **Supplementary Table 2**    ***Guardian* articles with story level pegs (Sept-Oct, 2014)** | |  |
| --- | --- | --- |
|  | |  |
| **Date** | **Topic description** | **Type** |
| Sept 12-18 | Nuclear power plants in Ukraine become a concern as political unrest continues | 2 |
| Sept 12-18 | Economic downturn in post- Chavez Venezuela: the economy suffers from hyper-inflation, lack of investments and labor strife | 2 |
| Sept 19-25 | Oscar Pistorius trial suggests race still colors justice in South Africa | 2 |
| Sept 19-25 | The new bill introduced aims to tame the traffic anarchy in India which causes deaths of 150 thousand annually | 2 |
| Sept 19-25 | Water shortage causes great concern in California which produces 80 percent of the world's almond harvest | 2 |
| Sept 19-25 | Sweden grows tire of tax cuts and privatization - a reactionary to anti-socialist policy | 2 |
| Sept 19-25 | Hundreds of thousands in Catalonia take to the streets demanding Catalan independence from Spain | 1 |
| Sept 26-Oct 2 | Moscow grows assertive towards the Baltic states - people there are fearful of Russian aggressiveness | 2 |
| Oct 3-9 | Hundreds of young women are leaving their homes in Western countries to join radical Islamic fighters in the Middle East, a trend that has disturbed and shocked the Western world. * | 1 & 3 |
| Oct 3-9 | Romania dealing with the communist past: prosecution of a former communist prison commander brings up painful memories and wrenching social debate about the past. | 2 |
| Oct 3-9 | Hope rises that Pope Francis will restart conversation about easing punishment on Catholics who divorced - despite opposition to such move within the Church.** | 1 & 3 |
| Oct 3-9 | Environmentalists are warning that elephant poaching is occurring in an unprecedented scale in Mozambique | 2 |
| Oct 3-9 | Timbuktu, a city of gold, is disintegrating due to war, greed and human neglect | 1 |
| Oct 10-16 | "Clean India" drive in India: the government of India, spearheaded by premier Modi, has launched a campaign to make public places in India cleaner and to improve the public hygiene | 1 |
| Oct 10-16 | Catalonian independence movement gains momentum and fever rises to unprecedented level | 1 |
| Oct 17-23 | China's authoritative news media raises warning against and accuses Japanese animated character, Doraemon, for corrupting the minds of Chinese youths. Such soft power influences from Japan is interpreted as having subversive effects on people who suffered atrocities at the hands of Japanese military during World War II. | 2 & 3 |
| Oct 17-23 | Wedding industry in Las Vegas pins hopes on gay and lesbian marriages as the federal court lifts ban on gay marriage in Nevada | 2 |
| Oct 17-23 | Illegal logging in the Amazon goes unrestrained as loggers find eager buyers overseas | 1& 2 |
| Oct 17-23 | Large amounts of donation were raised in a conference to help rebuild Gaza but the city remains in shambles | 1 & 2 |
| Oct 17-23 | International aid agencies have warned of an impending famine in the Sudan as civil war intensifies | 2 |
|  | *This article's "lived" component (Type 3) was the fact that the women associated with Isis were from the Western world. Type 1 component was the Islamic religion and history.  ** Articles that pivoted on the Catholic Church and the policy of the Vatican were considered Type 1 because of its ancient history. Type 3 component in this story was that the question of divorce relating to Catholicism is a familiar matter relating to believers’ life or the larger community’s. It was only considered Type 1 in the case of Asahi’s coverage (Oct 8, 2014, Table 3) because the religion is not part of most people’s lives in Japan. |  |

| ***Guardian* articles with story level pegs (Sept-Oct, 2000)** | |  |
| --- | --- | --- |
| **Date** | **Topic description** | **Type** |
| Sept 7-13 | Violence between black and white communities grows in South Africa | 2 |
| Sept 14-20 | From Singapore, Indonesia, Myanmar to Hong Kong, the "Asian way" fails to make substantial progress in democratic governance | 2 |
| Sept 21-27 | Indonesian President orders the arrest of the son of former dictator Suharto in connection with a bomb explosion | 2 |
| Sept 21-27 | Led by Aung San Suu Kyi, Burma's National League for Democracy announced it will draw up a new constitution for the country | 2 |
| Sept 28-Oct 4 | Israel contemplates ceding the administration of the holy site in Jerusalem to the UN | 1 |
| Sept 28-Oct 4 | CIA and former Chilean secret police are divulging secrets regarding the planned overthrow of the government of Salvador Allende in the early 1970s | 2 |
| Sept 28-Oct 4 | National Police Agency's new policy to expose Japanese gangsters, Yakuza, by making their names, addresses and affiliations public | 1 |
| Oct 5-11 | White supremacists and neo-confederates reassert their values and launch a renewed independence movement | 1 |
| Oct 5-11 | The parsi tradition in India to have vultures pick clean the body of the dead faces extinction as population of the vultures decline | 2 |
| Oct 5-11 | Charges against former Indonesian dictator Suharto was dropped as independent doctors find him mentally and physically unfit to stand trial | 2 |
| Oct 19-25 | A former Bosnian-Serb general accused of leading Srebrenica massacre denied his role in killings in a war crime tribunal in the Hague | 2 |
| Oct 19-25 | Renewed violence between Arabs and the Jews brings in a new cycle of vengeance led by extremists on both sides | 1 |

|  |  |  |
| --- | --- | --- |
| ***Guardian* articles with story-level pegs (Sept-Oct, 1985)** | |  |
|  | |  |
| **Date** | **Topic description** | **Type** |
| Sep 2-8 | Laws of apartheid keep the dead (the buried) segregated in the burial grounds | 2 |
| Sep 16-22 | The government of president Botha is slowly moving towards reform and abolition of the racist policies | 2 |
| Sep 16-22 | Analysis of the recent government move to restore citizenship to millions of blacks and to further dismantle Apartheid | 2 |
| Oct 14-20 | South Africa's opposition party joins in the call to release Nelson Mandela from prison and to dismantle Apartheid | 2 |
| Oct 14-20 | Essay: The myth, reality and tourism in the Polynesia islands | 1 |

| **Supplementary Table 3**    ***Asahi* articles with story-level pegs (Sept-Oct, 2014)** | |  |
| --- | --- | --- |
| **Date** | **Topic description** | **Type** |
| 9-Sep | A journalist's encounter with racism in the United States includes being called a "Navajo" on the street | 1 |
| 9-Sep | Duchess Catherine is now pregnant with second prince | 1& 3 |
| 18-Sep | Article questions the claim/ ability of Chinese-made drone having taken pictures over the Diaoyu island (questionable Chinese technology) | 2 |
| 18-Sep | South Korean president Park expresses the desirability of holding a foreign minister-level meeting with North Korea | 2 |
| 8-Oct | The Vatican discusses Catholic taboos such as birth control and gay & lesbian marriage | 1 |
| 12-Oct | Tension between India and Pakistan over Kashmir reignites | 2 |
| 12-Oct | A "South-North" meeting between the Koreas may be called due to recent armed conflict | 2 |
| 12-Oct | Air pollution in Beijing has exceeded the prescribed pollution standards | 2 |
| 17-Oct | Rio's slums and its squalid living conditions and the popularity of Japanese restaurants in pre-Olympics Brazil | 2 |
| 17-Oct | Black Magic in Africa: Reporter and his assistant's encounter with a fearsome black magician in Nigeria | 1 |
|  |  |  |
|  |  |  |
| ***Asahi* articles with story-level pegs (Sept-Oct, 2000)** | |  |
| **Date** | **Topic description** | **Type** |
| 1-Sep | South-North Koreas continue the dialogue at the ministerial level to improve relations | 2 |
| 1-Sep | Jerusalem mayor’s statement - he is ready to accept a compromise solution on the city's control: “Sovereignty of the city belongs to ‘God’” | 1 |
| 1-Sep | South Africa continues to grapple with racial discrimination and hatred | 2 |
| 1-Sep | Former Indonesian president Suharto faced trial for embezzlement but he was absent and only his lawyer showed up | 2 |
| 1-Sep | Analysis of the former dictator Suharto's regime | 2 |
| 1-Sep | Discussion on gay and lesbian relationship heats up in Italy amid opposition from the Vatican | 1 |
| 1-Sep | US pledges financial aid package to Colombia for war on drugs | 2 |
| 12-Sep | Aung San Suu Ki remains "secluded" and is held up by the military junta and is unable to meet with foreign diplomats and journalists | 2 |
| 21-Sep | Aung San Suu Ki announces she will visit the countryside in defiance of the military government's order to stay put in the capital | 2 |
| 21-Sep | Ethnic strife in Africa - ongoing conflict between the Tutsis and the Hutus | 2 |
|  |  |  |
|  |  |  |
|  |  |  |
|  |  |  |
| ***Asahi* articles with story-level pegs (Sept-Oct, 1985)** | |  |
| **Date** | **Topic description** | **Type** |
| 1-Sep | Chinese government attempts to lure Dalai Lama into returning to Tibet | 1 |
| 1-Sep | Anti-discrimination group in South Africa refuses to meet with European  Community foreign ministers on grounds they will not meet with the imprisoned Nelson Mandela | 2 |
| 1-Sep | Death tolls from racial riots in South Africa rise | 2 |
| 9-Sep | US Federal government's plans to relocate Indians from the reserves in Arizona | 1 |
| 9-Sep | Riots in South Africa widen as security forces attempt to contain violence | 2 |
| 11-Sep | Analysis of the post-war evolution of Chinese communist leadership | 2 |
| 21-Sep | South-North Koreas allow mutual visitation of families separated since the country split into two halves | 2 |
| 21-Sep | Members of the South Korean group visiting North Korea included a former minister, a singer and a religious leader | 2 |
| 21-Sep | Interview with a Vatican leader on contemporary world issues and challenges | 1 |
